# Supplementary material for: Sodium complexes bearing cavity-like conformations: a highly active and well-controlled catalytic system for macrolactone homo- and copolymerization
Source: Royal Society of Chemistry journal article supplement (doi:10.1039/d0py01580f), 2021-01-01
Supplement: d0py01580f1.pdf [file d0py01580f1.pdf]

# **Sodium Complexes Bearing Cavity-like Conformations: A Highly Active and Well-Controlled Catalytic System for Macrolactone Homo- and Copolymerizations**

Xinya Wang<sup>a</sup>, Xiaohua Wang<sup>b</sup>, Nuo Zhen<sup>a</sup>, Jin Gu<sup>a</sup>, Hao Zhang<sup>\*a</sup>, Bo Dong<sup>\*c</sup>, Feng Wang<sup>\*b</sup>, Heng Liu<sup>b</sup>

a. College of Food Science and Engineering, National Engineering Laboratory for Wheat and Corn Deep Processing, Jilin Agricultural University, Changchun 130118, PR China.

b. Key Laboratory of Rubber-Plastics, Ministry of Education/ Shandong Provincial Key Laboratory of Rubber-plastics, Qingdao University of Science & Technology, Qingdao, 266042, China;

c. Changchun Institute of Applied Chemistry, Chinese Academy of Sciences, 5625 Renmin Street, Changchun 130022, P.R. China;

e-mail: zhanghao3318@sina.com; bdong0118@126.com; fengwang@qust.edu.cn

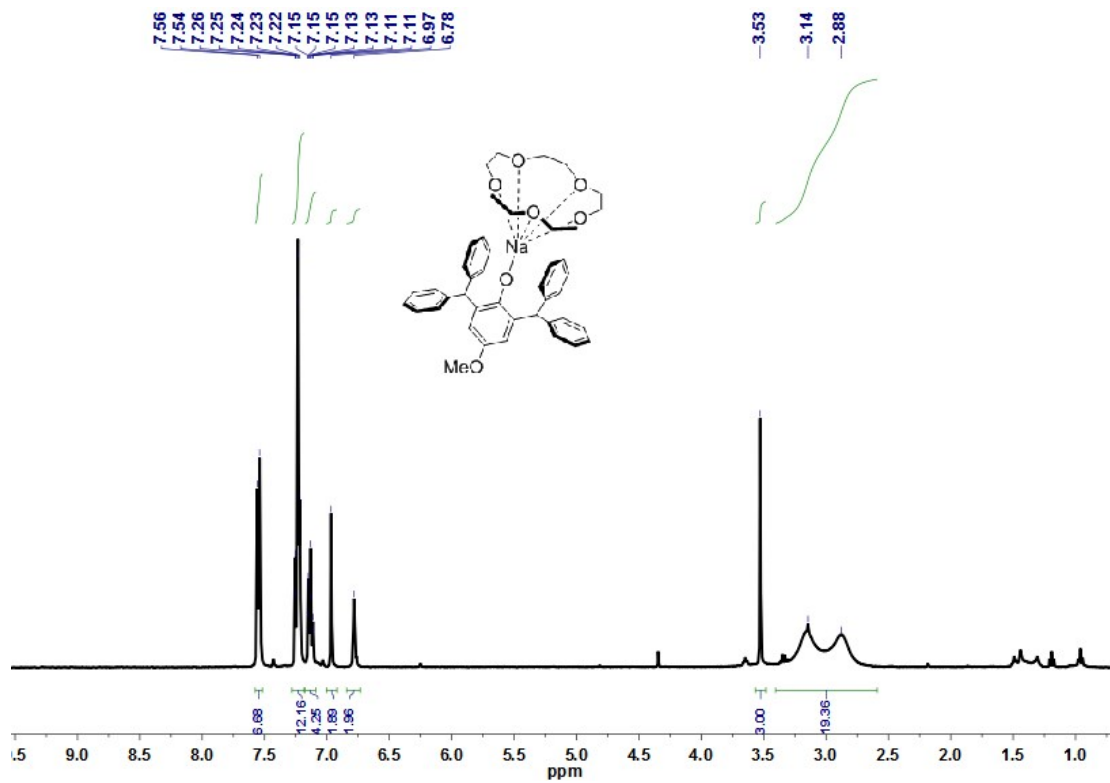

Figure S1.  $^1\text{H}$  NMR spectrum of complex Na1.

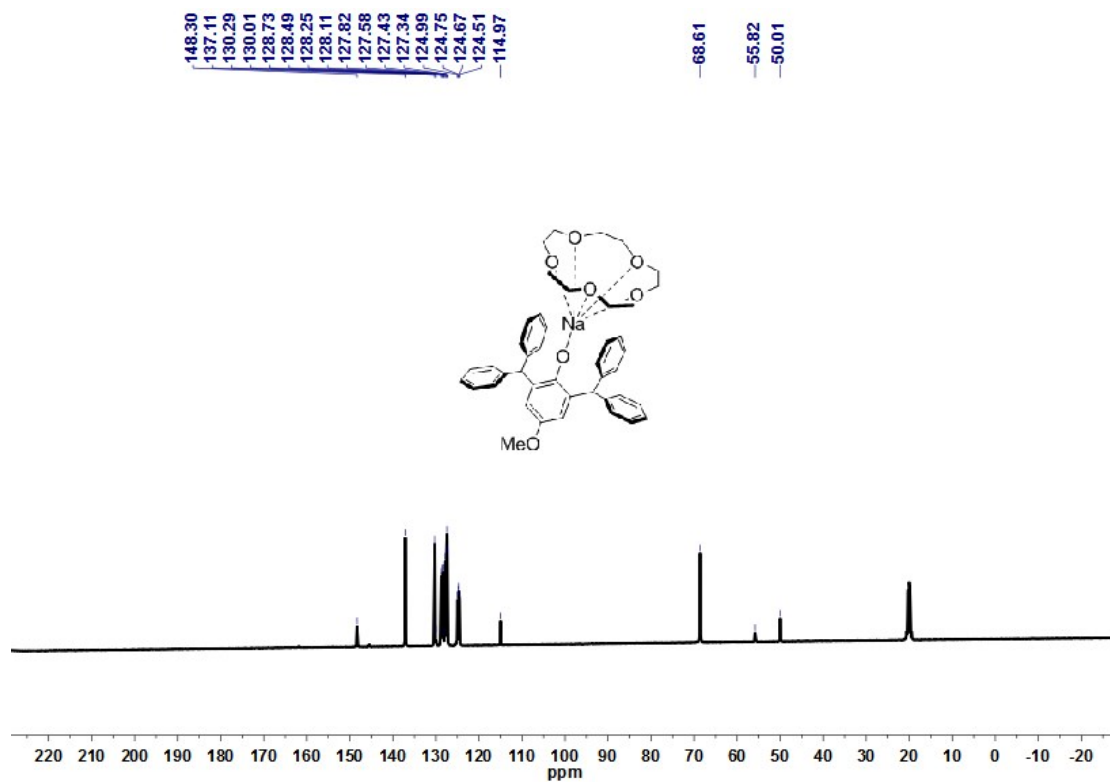

Figure S2.  $^{13}\text{C}$  NMR spectrum of complex Na1.

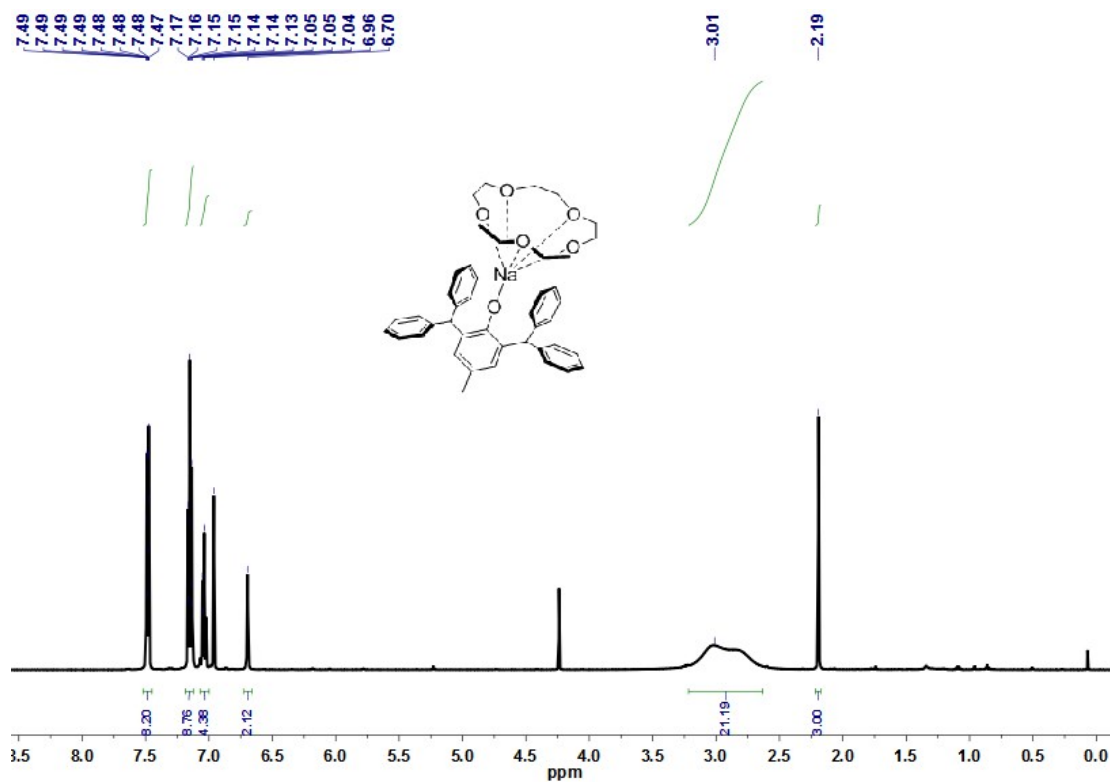

Figure S3.  $^1\text{H}$  NMR spectrum of complex Na2.

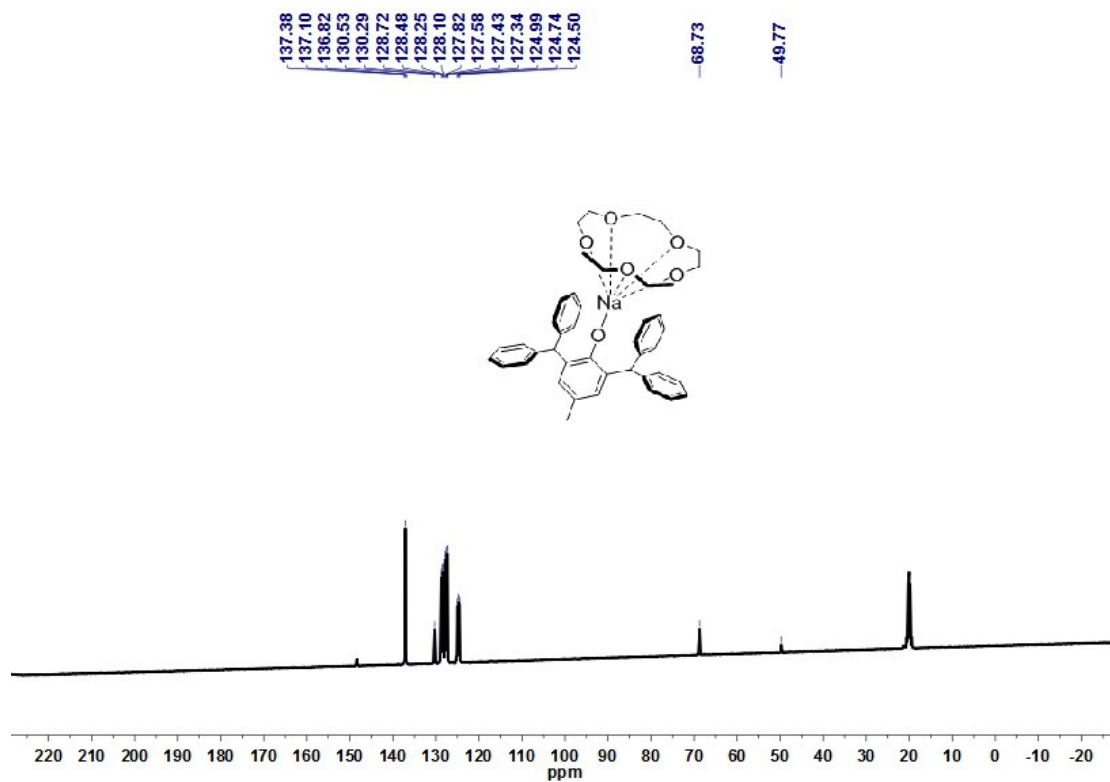

Figure S4.  $^{13}\text{C}$  NMR spectrum of complex Na2.

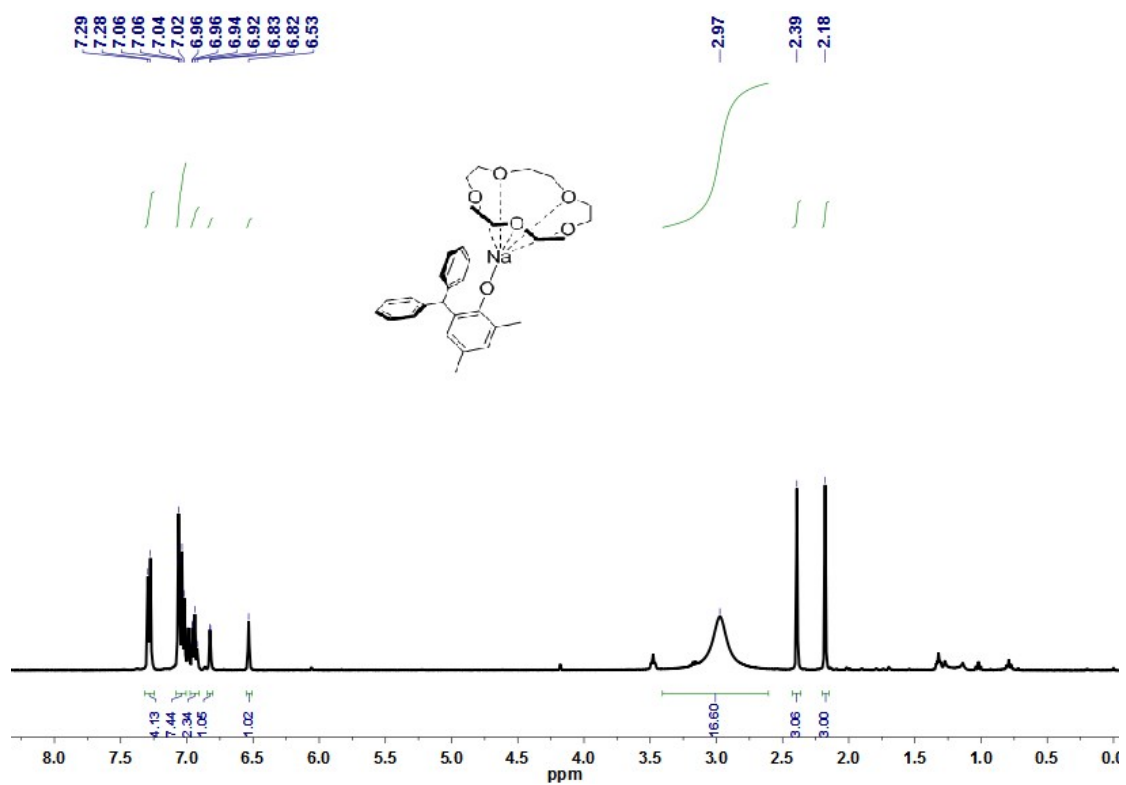

**Figure S5.  $^1\text{H}$  NMR spectrum of complex Na3.**

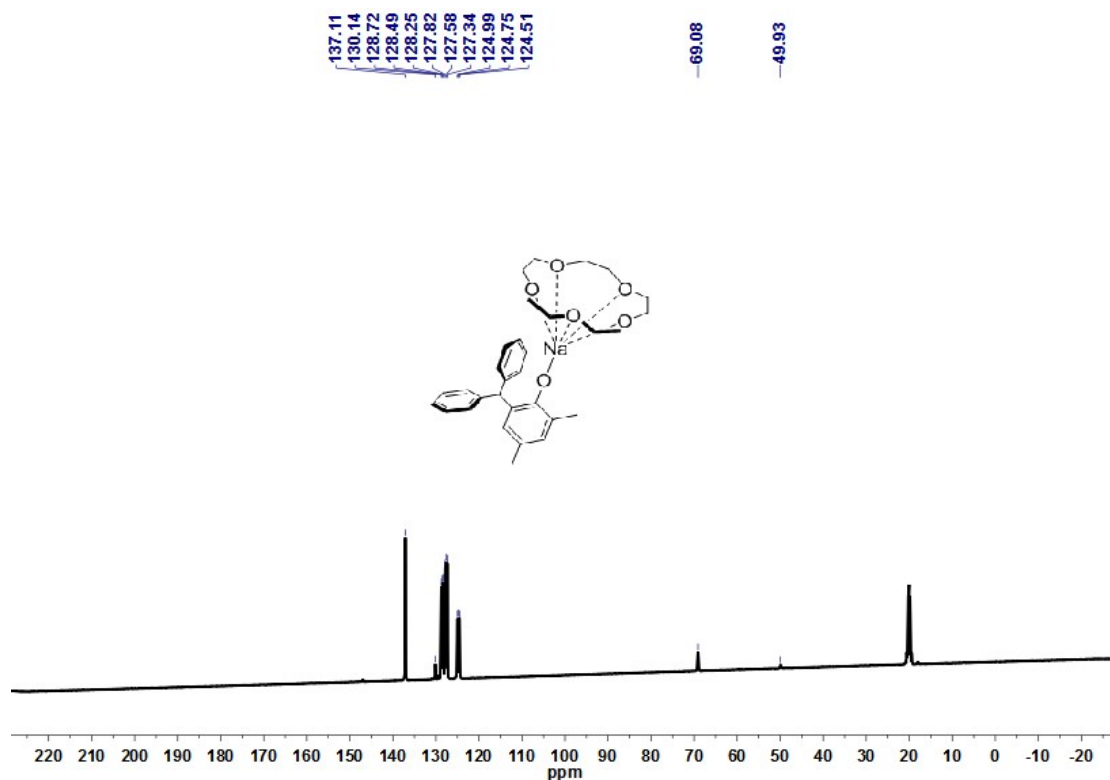

**Figure S6.  $^{13}\text{C}$  NMR spectrum of complex Na3.**

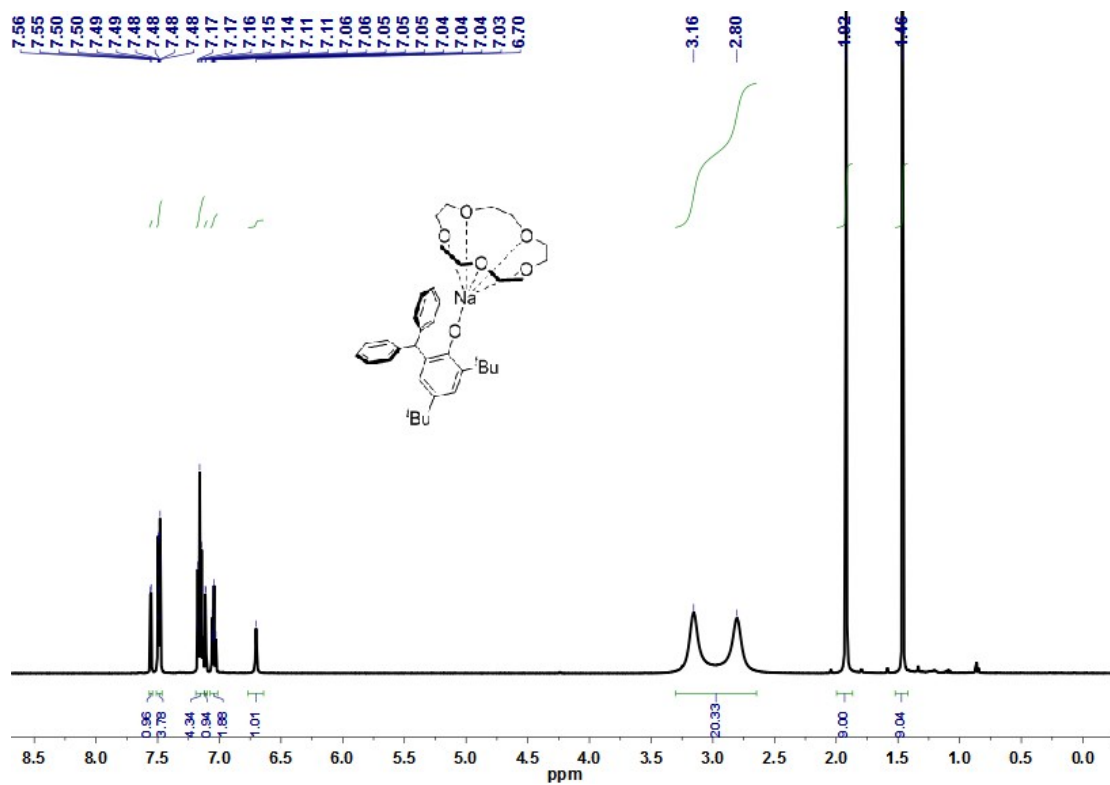

Figure S7.  $^1\text{H}$  NMR spectrum of complex Na4.

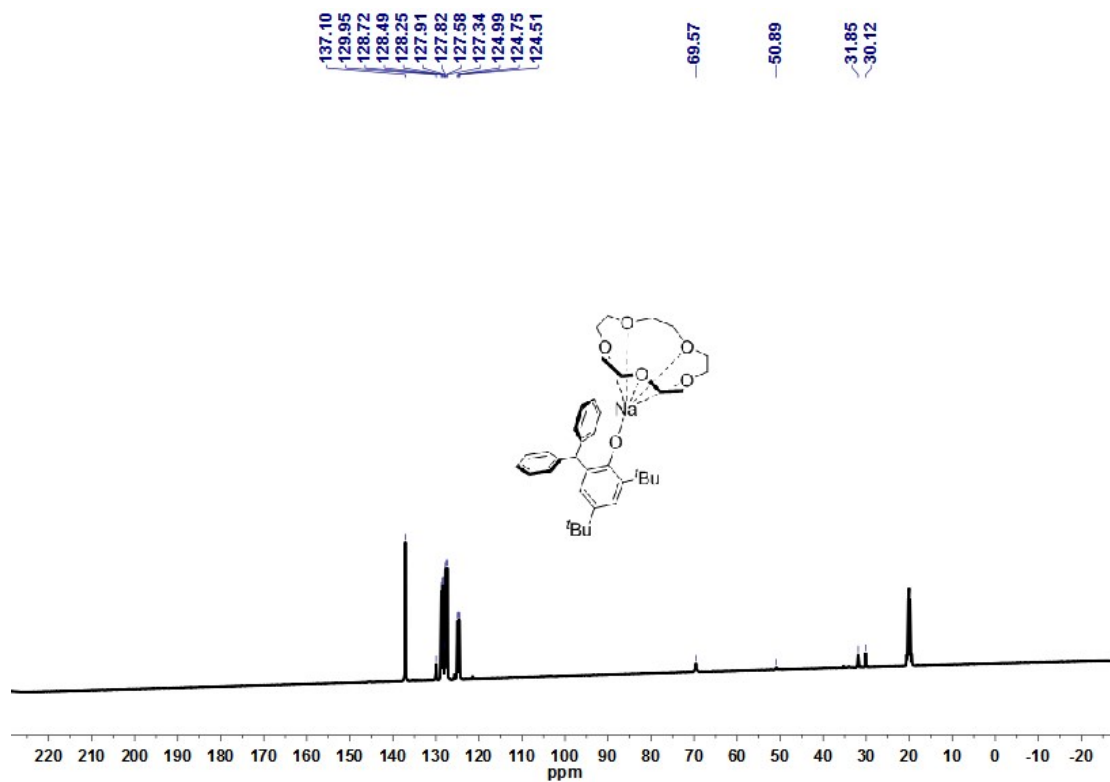

Figure S8.  $^{13}\text{C}$  NMR spectrum of complex Na4.

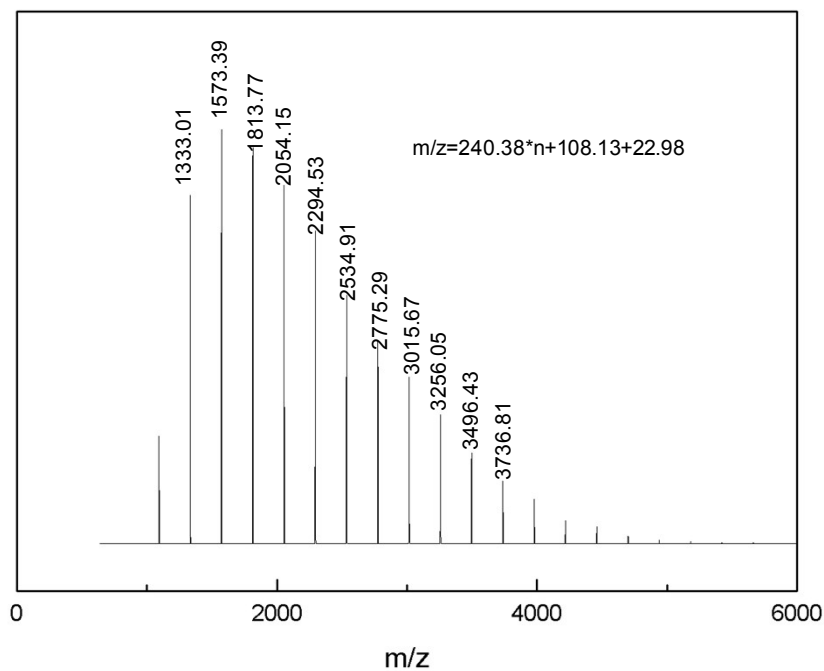

**Figure S9.** MALDI-TOF MS analysis of low molecular weight PPDL  
( $\text{PhCH}_2\text{OH}+n(\text{PDL})+\text{Na}^+$ ).

**Table S1.** Ring opening polymerization of PDL by using complex **Na5**.

| Entry <sup>a</sup> | Cat.       | ROH                      | [M]/[ROH]/[Cat.] | T (°C) | Yield (%) | $M_n^b$ ( $\times 10^4$ ) | $\bar{D}^b$ |
|--------------------|------------|--------------------------|------------------|--------|-----------|---------------------------|-------------|
| 1                  | <b>Na5</b> | $\text{Ph}_2\text{CHOH}$ | 100/1/1          | 110    | 99.0      | 1.12                      | 3.41        |

<sup>a</sup>Polymerization conditions: toluene, [PDL]= 2.6 M, 5h. <sup>b</sup> Determined by high temperature GPC against polystyrene standard,  $\bar{D}$  is polydispersity.

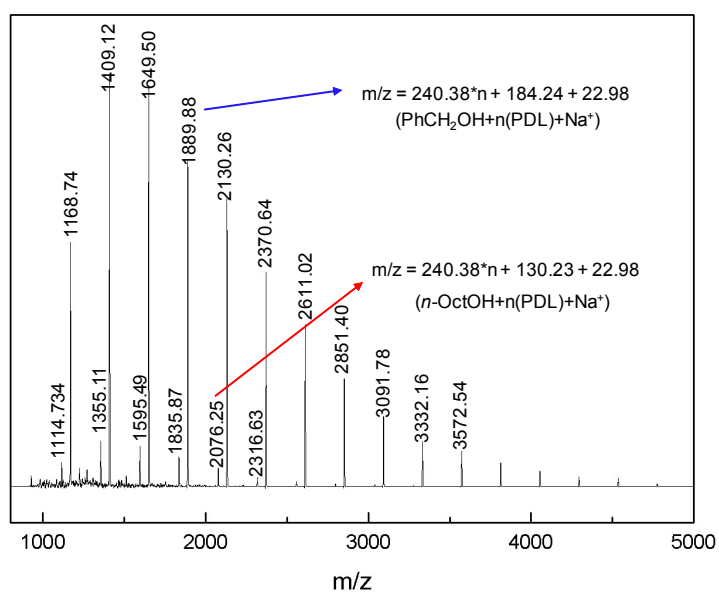

**Figure S10.** MALDI-TOF MS analysis of PPDL obtained from **Na5**.
